# Supplementary material
Source: publisher site journal article supplement (https://www.spandidos-publications.com/5630/downloadSupplementary)

Figure S1. FM regulated EMT in liver cancer cell line through Wnt signaling. Briefly, Hepa1-6 cells were treated with 20  $\mu$ m SKL2001 and/or 0.5 mg/ml FM for 24 h. Then, cells were lysed for western blot to detect the specific protein. Relative protein concentrations against GAPDH were calculated by Image J. The data are shown as the means  $\pm$  SD of three independent experiments. \*\*P<0.01 and \*\*\*\*P<0.0001 vs. SKL2001 group or control group.

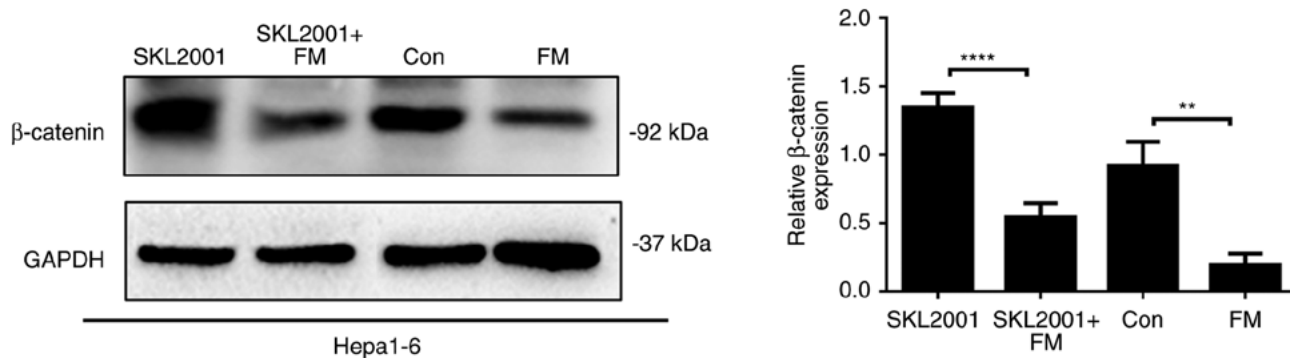

Supplement: Supplementary file 1 [file downloadSupplementary]
